## Responses to Temperatures of Different *Drosophila* Species

Ainul Huda<sup>1\*</sup>, Thomas J. Vaden<sup>1\*</sup>, Alisa A. Omelchenko<sup>1\*</sup>, Allison N. Castaneda<sup>1</sup>, Lina Ni<sup>1#</sup>

<sup>1</sup> School of Neuroscience, Virginia Polytechnic Institute and State University, Blacksburg, Virginia, USA

\* equal contribution

# corresponding author

E-mail: [linani@vt.edu](mailto:linani@vt.edu)

ORCID: 0000-0003-2155-5155

**Key words:** *Drosophila*, thermosensation, thermotaxis, warm avoidance, cool avoidance

### Summary statement

The ability to move and the preference for temperatures vary among fly species when flies are exposed to steep temperature gradients.

### Abstract

Temperature is a critical environmental variable that affects the distribution, survival, and reproduction of most animals. Although temperature receptors have been identified in different animals, how these receptors respond to temperatures is largely unknown. Here we use modified single-fly thermotactic assays to analyze movements and temperature preferences of nine *Drosophila* species. The ability/inclination to move varies among these species and at different temperatures. Importantly, different species prefer various ranges of temperatures. While wild-type *D. melanogaster* flies avoid the warm temperature in the warm avoidance assay and the cool temperature in the cool avoidance assay, *D. bipectinata* and *D. yakuba* avoid neither warm nor cool temperatures and *D. biarmipes* and *D. mojavensis* do not avoid the warm temperature in the warm avoidance assay. These results demonstrate that *Drosophila* species have different mobilities and temperature preferences, thereby benefiting the research on molecular mechanisms of temperature responsiveness.

### Introduction

31 Temperature affects all aspects of physiology, from the rate of chemical reactions and the activity  
32 of biomolecules to the distribution of living organisms (Dell et al., 2011, Sengupta and Garrity,  
33 2013, Franks and Hoffmann, 2012). Temperature variation is particularly influential for small  
34 animals, such as insects, which depend on ambient temperatures to set their body temperatures  
35 (Garrity et al., 2010, Dillon et al., 2010). Many insect vectors of diseases, including mosquitoes,  
36 respond to the temperature of their warm-blooded hosts and use it to guide blood-feeding behaviors  
37 (Brown, 1951, Howlett, 1910, Corfas and Vosshall, 2015, Greppi et al., 2015, Greppi et al., 2020).

38 Fruit flies are a good insect model system to study thermosensation. In *D. melanogaster*,  
39 many thermosensory systems are governed by a small number of sensory neurons but control  
40 robust behaviors (Ni et al., 2013, Hamada et al., 2008, Klein et al., 2015, Budelli et al., 2019,  
41 Gallio et al., 2011). These sensory neurons possess evolutionarily conserved thermal molecules  
42 across *Drosophila* species and with insect vectors of diseases, including mosquitoes (Corfas and  
43 Vosshall, 2015, Greppi et al., 2020). Adult *D. melanogaster* flies possess several thermosensory  
44 systems to control different thermotactic behaviors (Barbagallo and Garrity, 2015). Arista warm  
45 and cool neurons guide rapid warm and cool avoidance when flies are exposed to steep temperature  
46 gradients. A gustatory receptor GR28B(D) is the warm receptor in arista warm neurons and three  
47 members from the Ionotropic Receptor (IR) family (IR25a, IR93a, and IR21a) form the cool  
48 receptor in arista cool neurons (Ni et al., 2013, Budelli et al., 2019). However, molecular  
49 mechanisms underlying how these thermoreceptors respond to temperatures are largely unknown.

50 Besides *D. melanogaster*, genomes of more than 20 other *Drosophila* species have been  
51 sequenced (Celniker et al., 2002, Hoskins et al., 2007, Hu et al., 2013, Clark et al., 2007, Stark et  
52 al., 2007, Chen et al., 2014). These sequenced species span a wide range of global distributions  
53 with diverse temperatures (Powell, 1997). Therefore, they may possess thermoreceptors that have  
54 evolved distinct temperature responsiveness through amino-acid changes at a few residues to adapt  
55 to their specific ecosystems. We thereby expect that they will offer opportunities to understand  
56 how thermoreceptors respond to temperatures.

57 This study modifies single-fly thermotactic assays and uses TrackMate to track fly  
58 movement (Budelli et al., 2019, Tinevez et al., 2017). Using these assays, we test 801 flies from  
59 four genotypes of *D. melanogaster* and eight other *Drosophila* species. We find starting  
60 temperatures and genders affect preference indices and identify several *Drosophila* species

61 mimicking temperature preferences of *D. melanogaster* thermoreceptor mutants. These results  
62 may benefit the research about molecular mechanisms of temperature responsiveness.

63

## 64 **Results**

### 65 ***Drosophila* species have diverse mobilities**

66 To understand temperature responses of different *Drosophila* species by thermotactic assays, we  
67 first analyzed their mobilities. Using single-fly warm and cool avoidance assays, we tested 801  
68 flies, including four genotypes of *D. melanogaster* as controls, *D. ananassae*, *D. biarmipes*, *D.*  
69 *biplectinata*, *D. erecta*, *D. ficusphila*, *D. mojavenensis*, *D. simulans*, and *D. yakuba*. A single fly was  
70 acclimated under a transparent cover (this cover is 83mm (length) X 58mm (width) X 2mm (height)  
71 and thus flies can only walk, but not fly) at  $25\pm 1^\circ\text{C}$  for 2 min and then allowed to explore between  
72 zones of  $25\pm 1^\circ\text{C}$  and  $31\pm 1^\circ\text{C}$  or  $11\pm 1^\circ\text{C}$  for 2 min. Their positions were recorded by TrackMate  
73 and moving distances were calculated. Next, we analyzed moving distances by pseudo-F statistics  
74 and identified 10 clusters. Flies in the cluster with the least moving distances moved from 107.584  
75 to 799.243 pixels. Independent visual analysis by four researchers agreed that flies in this cluster  
76 had limited mobilities; flies in other clusters were able to adequately explore both temperatures  
77 (Movie 1). 800 pixels was set as the threshold (the dashed line in Fig. 1). Flies that had moving  
78 distances shorter than 800 pixels were omitted from preference index (PI) analysis.

79 Most fly species moved significantly more in the warm avoidance assay than in the cool  
80 avoidance assay, including *WCS D. melanogaster*, *D. ananassae*, *D. biarmipes*, *D. biplectinata*, *D.*  
81 *erecta*, *D. mojavenensis*, *D. simulans*, and *D. yakuba* (Fig. 1). These data suggest that flies are more  
82 active in warm environments.

83 Moreover, fly species had diverse mobilities. In the warm avoidance assay, *D. erecta*  
84 moved the least and *D. mojavenensis* moved the most. The average moving distance of *D. erecta* was  
85 about 1/15 of *D. mojavenensis*. In the cool avoidance assay, *D. erecta* still moved the least, while the  
86 most active flies were *D. melanogaster Ir93a<sup>MI</sup>*, whose average moving distance was over 31 times  
87 that of *D. erecta* (Fig. 1). Of note, in the warm avoidance assay, moving distances from more than  
88 half of *D. ananassae* and *D. erecta* flies did not reach the threshold (Fig. 1) and were not further  
89 analyzed. Similarly, in the cool avoidance assay, less than half of *D. ananassae*, *D. erecta*, and *D.*  
90 *simulans* flies reached the threshold (Fig. 1) and their PIs were also not calculated.

91

92 **Starting temperatures and genders affect PIs**

93 Next, we tried to understand the effects of starting temperatures and genders in PIs using wild-  
94 type *WCS D. melanogaster*. The PI was calculated by dividing the difference of the time spent at  
95 25°C and the time spent at 31°C or 11°C by the total time. A positive PI indicates preference for  
96 25°C, while a negative PI indicates preference for 31°C or 11°C; PI near zero suggests no  
97 preference.

98 We divided *WCS* data from the warm avoidance assay into four groups: males starting at  
99 25°C, females starting at 25°C, males starting at 31°C, and females starting at 31°C. As shown in  
100 Fig. 2A, males and females had similar PIs when they started at the same temperatures. When flies  
101 started at different temperatures, PIs were significantly different. Flies that started at 25°C had  
102 strong preferences for 25°C, while flies that started at 31°C had no preferences between 25°C and  
103 31°C. These data suggest that starting temperatures, but not genders, affect PIs in the warm  
104 avoidance assay.

105 In the cool avoidance assay, we also divided *WCS* data into four groups: males starting at  
106 25°C, females starting at 25°C, males starting at 11°C, and females starting at 11°C (Fig. 2B).  
107 When flies started at 25°C, males had much a stronger preference for 25°C than female flies. This  
108 difference was not observed when they started at 11°C. Moreover, males that started at 25°C  
109 strongly preferred 25°C and males that started at 11°C had no preferences between 25°C and 11°C.  
110 For females, flies that started at 25°C had an average PI that was higher than those that started at  
111 11°C. But these two groups were not significantly different. Therefore, in the cool avoidance assay,  
112 both starting temperatures and genders affect PIs. In the following analysis, to understand the  
113 temperature preference of each fly species, males and females were separated and only flies that  
114 started at 25°C were analyzed.

115

116 ***D. biarmipes*, *D. bipectinata*, *D. mojavensis*, and *D. yakuba* don't avoid warm temperatures**

117 Finally, we calculated PIs of different fly species. As mentioned, only flies that started at 25°C  
118 were used. We tested four *D. melanogaster* genotypes: two wild types, *WCS* and *HCS*; a cool  
119 receptor mutant, *Ir93a<sup>MI</sup>*; and a warm receptor mutant, *Gr28b<sup>MB</sup>* (Knecht et al., 2016, Budelli et  
120 al., 2019, Ni et al., 2013). In the warm avoidance assay, both male and female *WCS* and *HCS*  
121 strongly preferred 25°C (Fig. 3A,B). PIs of *Gr28b<sup>MB</sup>* were significantly lower than that of *WCS*,  
122 which is consistent with previous reports (Ni et al., 2013, Simões et al., 2021, Budelli et al., 2019)

123 (Fig. 3A,B). *D. biarmipes*, *D. bipectinata*, and *D. yakuba* had similar PIs with *Gr28b<sup>MB</sup>*, suggesting  
124 that these species don't have preferences between 25°C and 31°C (Fig. 3A,B). *D. mojavensis* flies  
125 had a negative average PI, indicating they prefer 31°C (Fig. 3A,B).

126

### 127 ***D. bipectinata* and *D. yakuba* don't avoid cool temperatures**

128 In the cool avoidance assay, male *WCS* and *HCS* strongly preferred 25°C (Fig. 3C). As reported  
129 previously (Enjin et al., 2016, Budelli et al., 2019), cool receptor mutant *Ir93a<sup>MI</sup>* males had a lower  
130 average PI than *WCS* males (Fig. 3C). Average PIs of *D. ficusphila* and *D. yakuba* males were  
131 close to 0, indicating they have no preferences between 25°C and 11°C (Fig. 3C). *D. bipectinata*  
132 males had a negative average PI, suggesting they prefer 11°C (Fig. 3C).

133 Regarding female flies, *WCS* and *HCS* also preferred 25°C (Fig. 3D). Unexpectedly,  
134 *Ir93a<sup>MI</sup>* females had a similar average PI with *WCS* females. *D. bipectinata* and *D. yakuba* females,  
135 like their males, had PIs close to 0, indicating they have no preferences between 25°C and 11°C  
136 (Fig. 3D). On the other hand, *D. ficusphila* females behaved differently from their males: *D.*  
137 *ficusphila* males had no preferences between 25°C and 11°C but their females had strong  
138 preferences for 25°C. These data further suggest that genders affect PIs, at least in the cool  
139 avoidance assay.

140

## 141 **Discussion**

142 In this study, we modify single-fly thermotactic assays and use TrackMate to track fly movements.  
143 We test 801 flies, including four genotypes of *D. melanogaster* and eight other *Drosophila* species.  
144 We find that fly species have different temperature preferences from wild-type *D. melanogaster*.  
145 Wild-type *D. melanogaster* flies avoid the high temperature of 31°C in the warm avoidance assay  
146 and the cool temperature of 11°C in the cool avoidance assay. *D. bipectinata* and *D. yakuba* avoid  
147 neither warm nor cool temperatures and *D. biarmipes* and *D. mojavensis* don't avoid the warm  
148 temperature in the warm avoidance assay. Our results also show that starting temperatures and  
149 genders affect PIs.

150 Most fly species move significantly more in warmer environments than in cool  
151 environments. But this isn't true for the cool receptor mutant *Ir93a<sup>MI</sup>* and the warm receptor mutant  
152 *Gr28b<sup>MB</sup>* (Knecht et al., 2016, Budelli et al., 2019, Ni et al., 2013). In these two mutants, moving  
153 distances are similar in both assays. Moreover, these two mutants move significantly more than

154 wild-type *D. melanogaster* *WCS* (Fig. 1). Reasons that cause these phenomena are unknown. One  
155 possibility is that these mutants *per se* move more. This possibility can be tested by measuring  
156 their moving distances in environments with unique temperatures. *Gr28b<sup>MB</sup>* supports this  
157 possibility and it moves more than *WCS* in 25°C (Omelchenko et al., 2021). An alternative  
158 possibility is that *Ir93a<sup>MI</sup>* and *Gr28b<sup>MB</sup>* move more only when they are allowed to explore different  
159 temperature zones. In this case, temperature receptors help animals not only choose an optimal  
160 temperature but also save energy. Further studies are needed to test these possibilities.

161 According to *WCS* data, starting temperatures affect PIs. The only pair that isn't  
162 significantly different is females that start at 25°C and 11°C in the cool avoidance assay. Even in  
163 this case, the average PI of the former group is higher than that of the latter group (Fig. 2B).  
164 Moreover, genders also affect PIs, at least in the cool avoidance assay. For example, in the cool  
165 avoidance assay, *WCS* males have stronger preferences for 25°C than their female counterparts  
166 when they start at 25°C (Fig. 2B). In addition, *D. ficusphila* males have no preferences between  
167 25°C and 11°C but females have strong preferences for 25°C (Fig. 3C,D).

168 GR28BD is the warm receptor that controls warm avoidance when flies are exposed to a  
169 steep gradient (Ni et al., 2013, Simões et al., 2021, Budelli et al., 2019). As expected, *Gr28b<sup>MB</sup>* has  
170 defects in the warm avoidance assay, but not in the cool avoidance assay (Fig. 3). IR93a is a  
171 component of the cool receptor that is required for flies to avoid cool temperatures upon exposure  
172 to a steep gradient and its mutant has been reported to be deficient in avoiding both warm and cool  
173 temperatures (Enjin et al., 2016, Budelli et al., 2019, Knecht et al., 2016). In our warm avoidance  
174 assay, *Ir93a<sup>MI</sup>* flies have lower, but not significantly different PIs compared to *WCS* (Fig. 3A,B).  
175 The difference may be because we only analyze flies that start at 25°C. In the cool avoidance assay,  
176 *Ir93a<sup>MI</sup>* males have PIs that are significantly lower than *WCS* males (Fig. 3C), which is consistent  
177 with previous studies. However, *Ir93a<sup>MI</sup>* females have a similar average PI with *WCS* females (Fig.  
178 3D). We suspect that this is because *WCS* females have lower PIs (Fig. 2B) or our cool avoidance  
179 assay uses a lower temperature in the cool zone than the previous study (Budelli et al., 2019). Of  
180 note, IR25a is another cool receptor component and its mutant doesn't have defects in avoiding  
181 10°C (Enjin et al., 2016). Further studies on the functions of the cool receptor are needed.

182 In the warm avoidance assay, *D. biarmipes*, *D. bipectinata*, *D. mojavensis*, and *D. yakuba*  
183 show different temperature preferences from *D. melanogaster*. In the cool avoidance assay, *D.*  
184 *bipectinata* and *D. yakuba* have different temperature preferences. Warm and/or cool receptors



185 from these species may offer opportunities to understand how thermoreceptors respond to different  
186 temperatures.

187 In summary, this study uses behavioral assays to understand fly temperature preferences  
188 and identifies fly species that have different temperature preferences from *D. melanogaster*. In the  
189 future, temperature preferences of other fly species should be analyzed and thermosensory organs,  
190 neurons, and molecular receptors should be compared among different fly species to understand  
191 mechanisms underlying temperature preferences.

192

## 193 **Materials and methods**

### 194 ***Drosophila* strains:**

195 *White Canton-S (WCS)* was used as the wild-type *D. melanogaster* control. *Heisenberg Canton-S*  
196 (*HCS*) and *D. mojavensis* were kind gifts from Dr. Michael Dickinson. *Ir93a<sup>MI</sup>* (Knecht et al., 2016)  
197 and *Gr28b<sup>MB</sup>* (Ni et al., 2013) were previously reported. Other fly species were from the National  
198 *Drosophila* Species Stock Center: *D. ananassae* (14024-0371.11), *D. biarmipes* (14023-0361.03),  
199 *D. bipectinata* (14024-0381.21), *D. erecta* (14021-0224.05), *D. ficusphila* (14025-0441.01), *D.*  
200 *simulans* (14021-0251.011), and *D. yakuba* (14021-0261.48).

201

### 202 **Thermotactic behavioral assay:**

203 Flies were raised at 25°C under 12-hour light/12-hour dark cycles and were 3±1 days from eclosure  
204 when experiments were performed. All experiments were performed between 8:00 am and 12:00  
205 pm. Fly species that were deemed difficult to distinguish sex via the naked eye were observed and  
206 divided under a microscope using a cold plate 24 hours in advance. The warm avoidance assay  
207 was performed as described (Omelchenko et al., 2021). Experimental procedures for cool  
208 avoidance behavioral assays were identical to previously mentioned procedures, apart from  
209 replacing the right-side hot plate with a glass casserole dish filled with ice, with more ice placed  
210 on top of the steel plate with the left plate temperature set to 25±1°C and the right plate to 11±1°C.

211 The images collected from the warm and cool avoidance assay were pre-processed by  
212 ImageJ and analyzed by TrackMate as described (Tinevez et al., 2017, Omelchenko et al., 2021).  
213 The preference index was calculated by the following formula:

$$214 \text{ PI} = \frac{(\text{time in } 25^{\circ}\text{C}) - (\text{time in } 31^{\circ}\text{C or } 11^{\circ}\text{C})}{\text{Total time}}$$

215           A Python script was developed to calculate moving distances and preference indices.

216

217   **Statistical analysis:**

218   Statistical details of experiments are mentioned in the figure legends. The normality of  
219   distributions was assessed by the Shapiro-Wilk W test ( $p \leq 0.05$  rejected normal distribution).

220   Statistical comparisons of normally distributed data were performed by the Welch's t test. For data  
221   that did not conform to a normal distribution, statistical comparisons were performed by the Mann-

222   Whitney test. Data analysis was performed using GraphPad Prism 9. The pseudo-F statistics was  
223   performed by R.

224



225 **Acknowledgements**

226 We acknowledge Dr. Jianhong Ou for the R script for the pseudo-F statistics, Dr. Michael  
227 Dickinson for *HCS* and *D. mojavensis* flies.

228

229 **Competing interest**

230 No competing interests declared

231

232 **Funding**

233 This work was supported by the National Institutes of Health (R21MH122987 to L.N. and  
234 R01GM140130 to L.N.).

235

236 **Data availability**

237 The Python script has been deposited in GitHub and can be accessed at:  
238 <https://github.com/niflylab/SingleFlyAnalysis.git>.

239 Original statistics and raw data are available at: <https://doi.org/10.7910/DVN/DNFWKI>.

240

241

242

243 **References**

- 244 BARBAGALLO, B. & GARRITY, P. A. 2015. Temperature sensation in *Drosophila*. *Curr Opin*  
245 *Neurobiol*, 34, 8-13.
- 246 BROWN, A. W. 1951. Factors in the attractiveness of bodies for mosquitoes. *Nature*, 167, 202.
- 247 BUDELLI, G., NI, L., BERCIU, C., VAN GIESEN, L., KNECHT, Z. A., CHANG, E. C., KAMINSKI, B.,  
248 SILBERING, A. F., SAMUEL, A., KLEIN, M., BENTON, R., NICASTRO, D. & GARRITY, P. A. 2019.  
249 Ionotropic Receptors Specify the Morphogenesis of Phasic Sensors Controlling Rapid  
250 Thermal Preference in *Drosophila*. *Neuron*.
- 251 CELNIKER, S. E., WHEELER, D. A., KRONMILLER, B., CARLSON, J. W., HALPERN, A., PATEL, S.,  
252 ADAMS, M., CHAMPE, M., DUGAN, S. P., FRISE, E., HODGSON, A., GEORGE, R. A., HOSKINS,  
253 R. A., LAVERTY, T., MUZNY, D. M., NELSON, C. R., PACLEB, J. M., PARK, S., PFEIFFER, B. D.,  
254 RICHARDS, S., SODERGREN, E. J., SVIRSKAS, R., TABOR, P. E., WAN, K., STAPLETON, M.,  
255 SUTTON, G. G., VENTER, C., WEINSTOCK, G., SCHERER, S. E., MYERS, E. W., GIBBS, R. A. &  
256 RUBIN, G. M. 2002. Finishing a whole-genome shotgun: release 3 of the *Drosophila*  
257 *melanogaster* euchromatic genome sequence. *Genome Biol*, 3, Research0079.
- 258 CHEN, Z. X., STURGILL, D., QU, J., JIANG, H., PARK, S., BOLEY, N., SUZUKI, A. M., FLETCHER, A. R.,  
259 PLACHETZKI, D. C., FITZGERALD, P. C., ARTIERI, C. G., ATALLAH, J., BARMINA, O., BROWN,  
260 J. B., BLANKENBURG, K. P., CLOUGH, E., DASGUPTA, A., GUBBALA, S., HAN, Y., JAYASEELAN,  
261 J. C., KALRA, D., KIM, Y. A., KOVAR, C. L., LEE, S. L., LI, M., MALLEY, J. D., MALONE, J. H.,  
262 MATHEW, T., MATTIUZZO, N. R., MUNIDASA, M., MUZNY, D. M., ONGERI, F., PERALES, L.,  
263 PRZYTYCKA, T. M., PU, L. L., ROBINSON, G., THORNTON, R. L., SAADA, N., SCHERER, S. E.,  
264 SMITH, H. E., VINSON, C., WARNER, C. B., WORLEY, K. C., WU, Y. Q., ZOU, X., CHERBAS, P.,  
265 KELLIS, M., EISEN, M. B., PIANO, F., KIONTE, K., FITCH, D. H., STERNBERG, P. W., CUTTER,  
266 A. D., DUFF, M. O., HOSKINS, R. A., GRAVELEY, B. R., GIBBS, R. A., BICKEL, P. J., KOPP, A.,  
267 CARNINCI, P., CELNIKER, S. E., OLIVER, B. & RICHARDS, S. 2014. Comparative validation of  
268 the *D. melanogaster* modENCODE transcriptome annotation. *Genome Res*, 24, 1209-23.
- 269 CLARK, A. G., EISEN, M. B., SMITH, D. R., BERGMAN, C. M., OLIVER, B., MARKOW, T. A., KAUFMAN,  
270 T. C., KELLIS, M., GELBART, W., IYER, V. N., POLLARD, D. A., SACKTON, T. B., LARRACUENTE,  
271 A. M., SINGH, N. D., ABAD, J. P., ABT, D. N., ADRYAN, B., AGUADE, M., AKASHI, H.,

- 272 ANDERSON, W. W., AQUADRO, C. F., ARDELL, D. H., ARGUELLO, R., ARTIERI, C. G.,  
273 BARBASH, D. A., BARKER, D., BARSANTI, P., BATTERHAM, P., BATZOGLOU, S., BEGUN, D.,  
274 BHUTKAR, A., BLANCO, E., BOSAK, S. A., BRADLEY, R. K., BRAND, A. D., BRENT, M. R.,  
275 BROOKS, A. N., BROWN, R. H., BUTLIN, R. K., CAGGESE, C., CALVI, B. R., BERNARDO DE  
276 CARVALHO, A., CASPI, A., CASTREZANA, S., CELNIKER, S. E., CHANG, J. L., CHAPPLE, C.,  
277 CHATTERJI, S., CHINWALLA, A., CIVETTA, A., CLIFTON, S. W., COMERON, J. M., COSTELLO,  
278 J. C., COYNE, J. A., DAUB, J., DAVID, R. G., DELCHER, A. L., DELEHAUNTY, K., DO, C. B.,  
279 EBLING, H., EDWARDS, K., EICKBUSH, T., EVANS, J. D., FILIPSKI, A., FINDEISS, S., FREYHULT,  
280 E., FULTON, L., FULTON, R., GARCIA, A. C., GARDINER, A., GARFIELD, D. A., GARVIN, B. E.,  
281 GIBSON, G., GILBERT, D., GNERRE, S., GODFREY, J., GOOD, R., GOTEA, V., GRAVELY, B.,  
282 GREENBERG, A. J., GRIFFITHS-JONES, S., GROSS, S., GUIGO, R., GUSTAFSON, E. A., HAERTY,  
283 W., HAHN, M. W., HALLIGAN, D. L., HALPERN, A. L., HALTER, G. M., HAN, M. V., HEGER, A.,  
284 HILLIER, L., HINRICHS, A. S., HOLMES, I., HOSKINS, R. A., HUBISZ, M. J., HULTMARK, D.,  
285 HUNTLEY, M. A., JAFFE, D. B., JAGADEESHAN, S., et al. 2007. Evolution of genes and  
286 genomes on the *Drosophila* phylogeny. *Nature*, 450, 203-18.
- 287 CORFAS, R. A. & VOSSHALL, L. B. 2015. The cation channel TRPA1 tunes mosquito thermotaxis to  
288 host temperatures. *Elife*, 4.
- 289 DELL, A. I., PAWAR, S. & SAVAGE, V. M. 2011. Systematic variation in the temperature  
290 dependence of physiological and ecological traits. *Proc Natl Acad Sci U S A*, 108, 10591-6.
- 291 DILLON, M. E., WANG, G. & HUEY, R. B. 2010. Global metabolic impacts of recent climate warming.  
292 *Nature*, 467, 704-6.
- 293 ENJIN, A., ZAHARIEVA, E. E., FRANK, D. D., MANSOURIAN, S., SUH, G. S., GALLIO, M. & STENSMYR,  
294 M. C. 2016. Humidity Sensing in *Drosophila*. *Curr Biol*, 26, 1352-8.
- 295 FRANKS, S. J. & HOFFMANN, A. A. 2012. Genetics of Climate Change Adaptation. *Annual Review*  
296 *of Genetics*, 46, 185-208.
- 297 GALLIO, M., OFSTAD, T. A., MACPHERSON, L. J., WANG, J. W. & ZUKER, C. S. 2011. The coding of  
298 temperature in the *Drosophila* brain. *Cell*, 144, 614-24.

- 299 GARRITY, P. A., GOODMAN, M. B., SAMUEL, A. D. & SENGUPTA, P. 2010. Running hot and cold:  
300 behavioral strategies, neural circuits, and the molecular machinery for thermotaxis in *C.*  
301 *elegans* and *Drosophila*. *Genes Dev*, 24, 2365-82.
- 302 GREPPI, C., BUDELLI, G. & GARRITY, P. A. 2015. Some like it hot, but not too hot. *Elife*, 4.
- 303 GREPPI, C., LAURSEN, W. J., BUDELLI, G., CHANG, E. C., DANIELS, A. M., VAN GIESEN, L., SMIDLER,  
304 A. L., CATTERUCCIA, F. & GARRITY, P. A. 2020. Mosquito heat seeking is driven by an  
305 ancestral cooling receptor. *Science*, 367, 681-684.
- 306 HAMADA, F. N., ROSENZWEIG, M., KANG, K., PULVER, S. R., GHEZZI, A., JEGLA, T. J. & GARRITY, P.  
307 A. 2008. An internal thermal sensor controlling temperature preference in *Drosophila*.  
308 *Nature*, 454, 217-20.
- 309 HOSKINS, R. A., CARLSON, J. W., KENNEDY, C., ACEVEDO, D., EVANS-HOLM, M., FRISE, E., WAN,  
310 K. H., PARK, S., MENDEZ-LAGO, M., ROSSI, F., VILLASANTE, A., DIMITRI, P., KARPEN, G. H.  
311 & CELNIKER, S. E. 2007. Sequence finishing and mapping of *Drosophila melanogaster*  
312 heterochromatin. *Science*, 316, 1625-8.
- 313 HOWLETT, F. M. 1910. The Influence of Temperature upon the Biting of Mosquitoes. *Parasitology*,  
314 3, 479-484.
- 315 HU, T. T., EISEN, M. B., THORNTON, K. R. & ANDOLFATTO, P. 2013. A second-generation assembly  
316 of the *Drosophila simulans* genome provides new insights into patterns of lineage-specific  
317 divergence. *Genome Res*, 23, 89-98.
- 318 KLEIN, M., AFONSO, B., VONNER, A. J., HERNANDEZ-NUNEZ, L., BERCK, M., TABONE, C. J., KANE,  
319 E. A., PIERIBONE, V. A., NITABACH, M. N., CARDONA, A., ZLATIC, M., SPRECHER, S. G.,  
320 GERSHOW, M., GARRITY, P. A. & SAMUEL, A. D. 2015. Sensory determinants of behavioral  
321 dynamics in *Drosophila* thermotaxis. *Proc Natl Acad Sci U S A*, 112, E220-9.
- 322 KNECHT, Z. A., SILBERING, A. F., NI, L., KLEIN, M., BUDELLI, G., BELL, R., ABUIN, L., FERRER, A. J.,  
323 SAMUEL, A. D., BENTON, R. & GARRITY, P. A. 2016. Distinct combinations of variant  
324 ionotropic glutamate receptors mediate thermosensation and hygrosensation in  
325 *Drosophila*. *Elife*, 5.

- 326 NI, L., BRONK, P., CHANG, E. C., LOWELL, A. M., FLAM, J. O., PANZANO, V. C., THEOBALD, D. L.,  
327 GRIFFITH, L. C. & GARRITY, P. A. 2013. A gustatory receptor paralogue controls rapid  
328 warmth avoidance in *Drosophila*. *Nature*, 500, 580-4.
- 329 OMELCHENKO, A. A., HUDA, A., CASTANEDA, A. N., VADEN, T. J. & NI, L. 2021. Using TrackMate  
330 to Analyze *Drosophila* Larval and Adult Locomotion. *bioRxiv*, 2021.09.28.462241.
- 331 POWELL, J. R. 1997. Progress and Prospects in Evolutionary Biology: The *Drosophila* Model.  
332 *Oxford University Press, Incorporated*.
- 333 SENGUPTA, P. & GARRITY, P. 2013. Sensing temperature. *Curr Biol*, 23, R304-7.
- 334 SIMÕES, J. M., LEVY, J. I., ZAHARIEVA, E. E., VINSON, L. T., ZHAO, P., ALPERT, M. H., KATH, W. L.,  
335 PARA, A. & GALLIO, M. 2021. Robustness and plasticity in *Drosophila* heat avoidance. *Nat*  
336 *Commun*, 12, 2044.
- 337 STARK, A., LIN, M. F., KHERADPOUR, P., PEDERSEN, J. S., PARTS, L., CARLSON, J. W., CROSBY, M.  
338 A., RASMUSSEN, M. D., ROY, S., DEORAS, A. N., RUBY, J. G., BRENNECKE, J., HODGES, E.,  
339 HINRICHS, A. S., CASPI, A., PATEN, B., PARK, S. W., HAN, M. V., MAEDER, M. L., POLANSKY,  
340 B. J., ROBSON, B. E., AERTS, S., VAN HELDEN, J., HASSAN, B., GILBERT, D. G., EASTMAN, D.  
341 A., RICE, M., WEIR, M., HAHN, M. W., PARK, Y., DEWEY, C. N., PACHTER, L., KENT, W. J.,  
342 HAUSSLER, D., LAI, E. C., BARTEL, D. P., HANNON, G. J., KAUFMAN, T. C., EISEN, M. B.,  
343 CLARK, A. G., SMITH, D., CELNIKER, S. E., GELBART, W. M. & KELLIS, M. 2007. Discovery of  
344 functional elements in 12 *Drosophila* genomes using evolutionary signatures. *Nature*, 450,  
345 219-32.
- 346 TINEVEZ, J. Y., PERRY, N., SCHINDELIN, J., HOOPES, G. M., REYNOLDS, G. D., LAPLANTINE, E.,  
347 BEDNAREK, S. Y., SHORTE, S. L. & ELICEIRI, K. W. 2017. TrackMate: An open and extensible  
348 platform for single-particle tracking. *Methods*, 115, 80-90.
- 349  
350

351 **Figures**

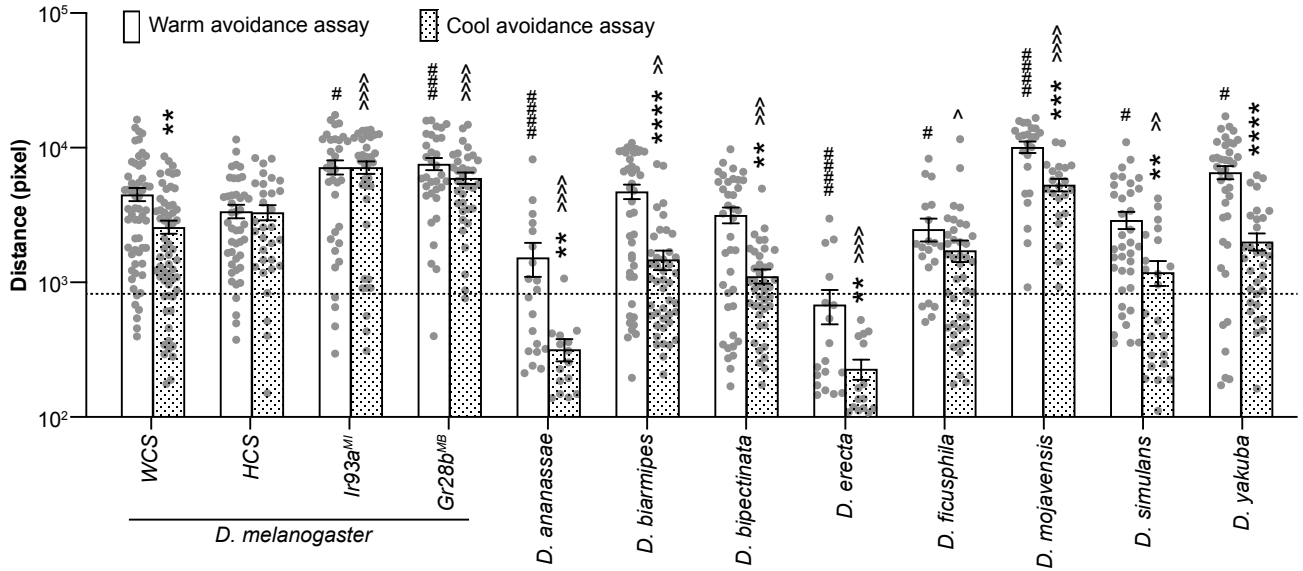

352

353 **Fig 1. *Drosophila* species have diverse mobilities.** Four genotypes (*WCS*, *HCS*, *Ir93a<sup>MI</sup>*, and  
354 *Gr28b<sup>MB</sup>*) of *D. melanogaster*, as well as *D. ananassae*, *D. biarmipes*, *D. bipectinata*, *D. erecta*,  
355 *D. ficusphila*, *D. mojavensis*, *D. simulans*, and *D. yakuba* were tested. The dashed line shows the  
356 threshold of the moving distance, 800 pixels. Data represent mean  $\pm$  SEM. \*\*  $p < 0.01$ , \*\*\*  $p <$   
357 0.001, and \*\*\*\*  $p < 0.0001$ ; comparing moving distances of the corresponding genotype/species  
358 in the warm avoidance assay; Mann-Whitney test, except Welch's test for *Gr28b<sup>MB</sup>*. #  $p < 0.05$ ,  
359 ###  $p < 0.001$ , and ####  $p < 0.0001$ ; comparing moving distances of *WCS* in the warm avoidance  
360 assay; Mann-Whitney test. ^  $p < 0.05$ , ^^  $p < 0.01$ , ^^ ^  $p < 0.001$ , and ^^ ^ ^  $p < 0.0001$ ; comparing  
361 moving distances of *WCS* in the cool avoidance assay; Mann-Whitney test.

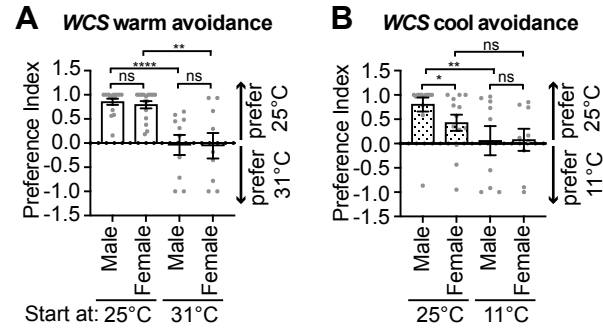

362

363 **Fig 2. Both starting temperatures and genders affect *WCS* PIs.** PIs of indicated groups in warm  
364 (A) and cool (B) avoidance assays. Data represent mean  $\pm$  SEM. \*  $p < 0.05$ , \*\*  $p < 0.01$ , and \*\*\*\*  
365  $p < 0.0001$ ; Mann-Whitney test, except Welch's test for the comparison of males starting at 31°C  
366 and females starting at 31°C in (A) and the comparison of females starting at 25°C and females  
367 starting at 11°C in (B).



Short Communications

Thermosensation of Different Fly Species

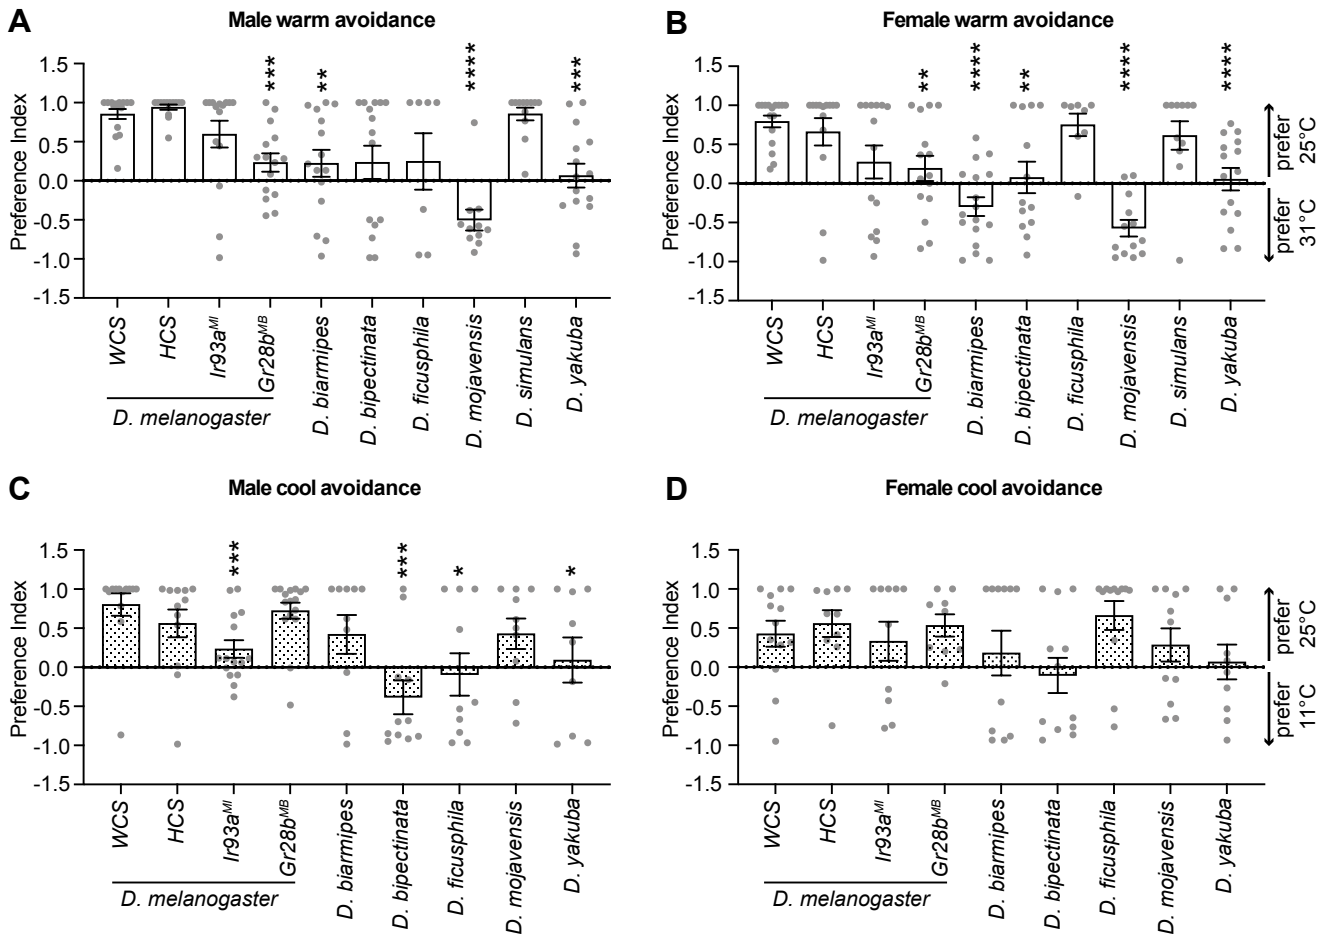

368

369 **Fig 3. *Drosophila* species have distinct temperature preferences.** (A,B) PIs of males (A) and  
 370 females (B) of indicated *D. melanogaster* genotypes or *Drosophila* species in the warm avoidance  
 371 assay. (C,D) PIs of males (C) and females (D) of the indicated *D. melanogaster* genotypes or  
 372 *Drosophila* species in the cool avoidance assay. Data represent mean  $\pm$  SEM. \*  $p < 0.05$ , \*\*  $p <$   
 373 0.01, \*\*\*  $p < 0.01$  and \*\*\*\*  $p < 0.0001$ ; comparing to the corresponding WCS; Mann-Whitney  
 374 test, except Welch's test for the comparison of WCS and *Gr28b<sup>MB</sup>* and WCS and *D. yakuba* in (B).

- 375 **Movie 1. Set the threshold value for moving distances.** Example trajectories from flies with  
376 moving distances of about 250 pixels, 450 pixels, 650 pixels, 850 pixels, and 1050 pixels.  
377 Trajectories are shown in red.
